# Supplementary material for: The photo-orientation of azobenzene in viscous solutions, simulated by a stochastic model
Source: Royal Society of Chemistry journal article supplement (doi:10.1039/c4cp03472d), 2014-01-01

V. Cantatore, G. Granucci, M. Persico  
The photo-orientation of azobenzene in viscous solutions, simulated by a  
stochastic model.

### Supplementary information.

Figure S1: Autocorrelation functions of the molecular axes  $\langle P_{1,n} \rangle(t) = \langle \hat{n}(t_0) \cdot \hat{n}(t_0 + t) \rangle$ , obtained by averaging over  $t_0$  the results of the ground state dynamics of TAB and CAB in ethylene glycol.

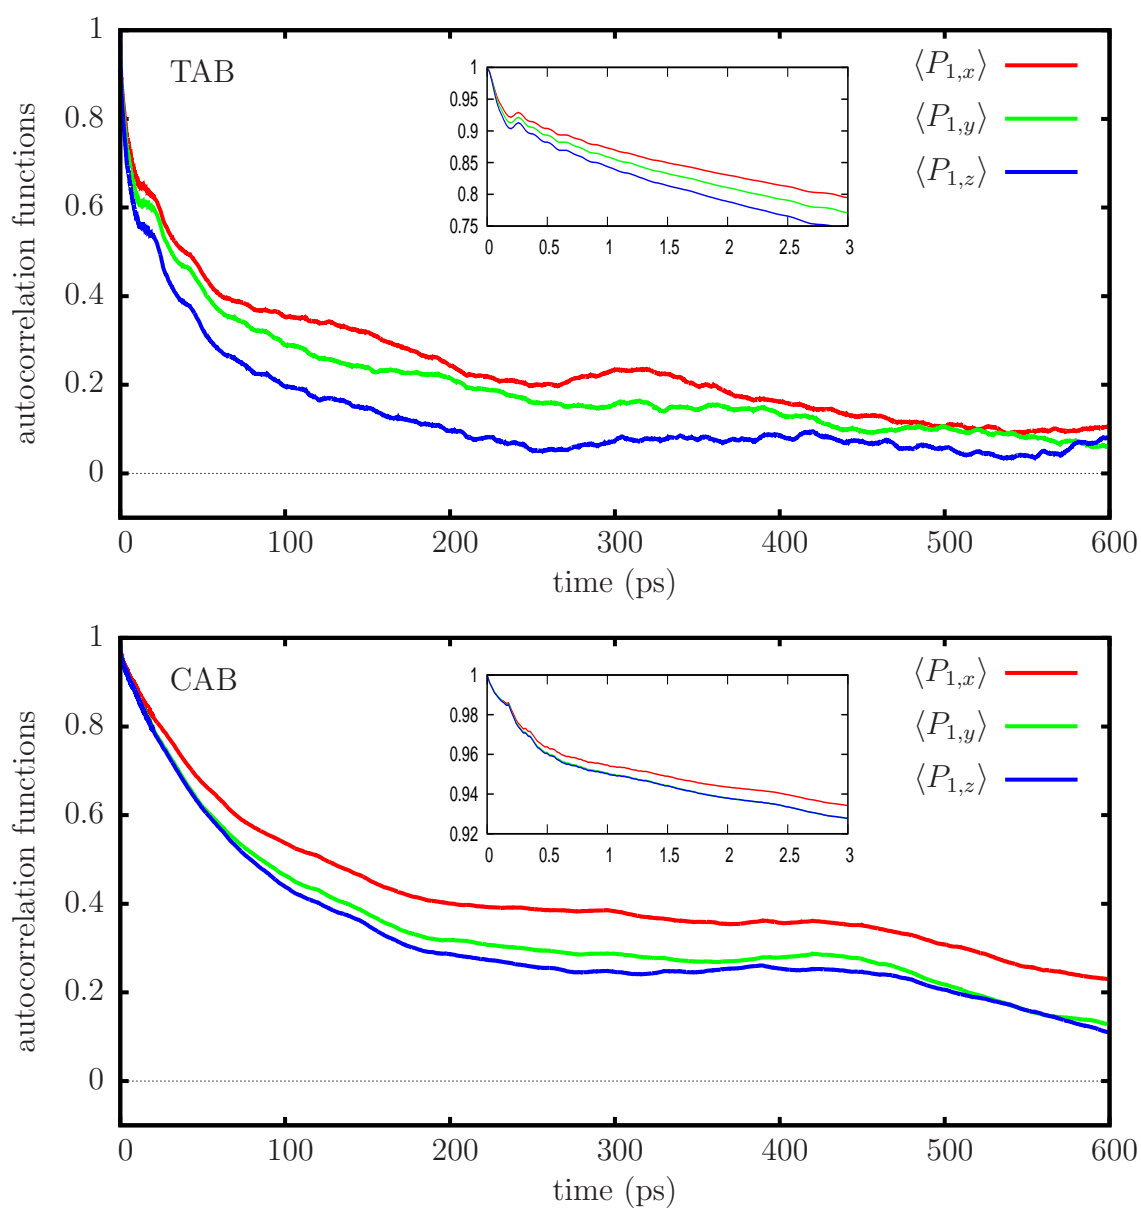

Figure S2: Autocorrelation functions of the molecular axes  $\langle P_{2,n} \rangle(t) = \frac{1}{2} \langle 3[\hat{n}(t_0) \cdot \hat{n}(t_0 + t)]^2 - 1 \rangle$ , obtained by averaging over  $t_0$  the results of the ground state dynamics of TAB and CAB in ethylene glycol.

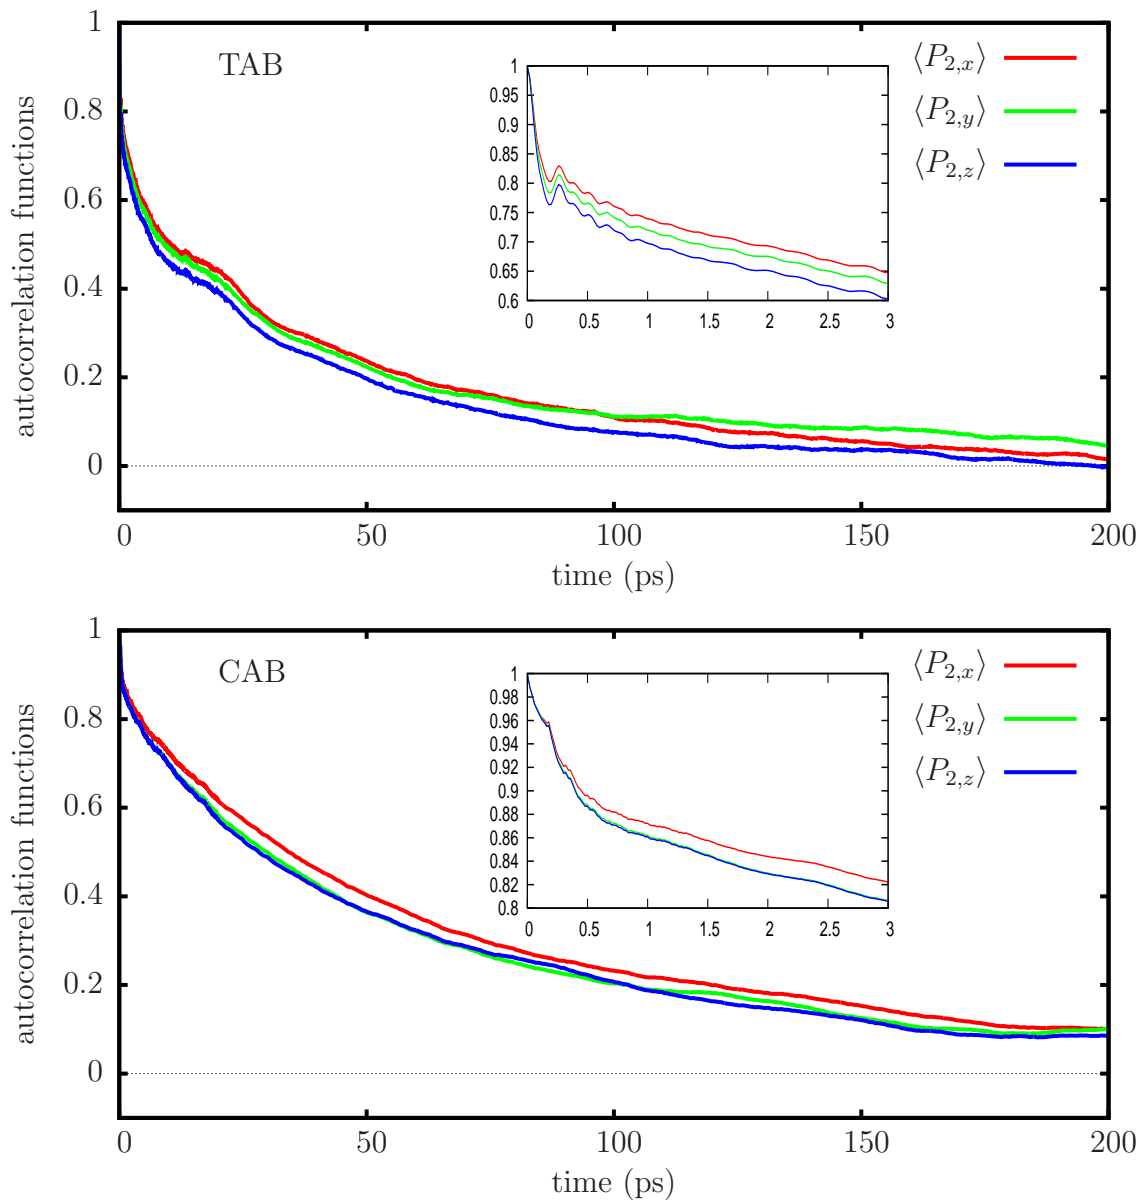

Figure S3: Isomeric fraction of CAB as a function of time. Wavelengths  $\lambda_{exc}$  in nm, irradiances  $F$  in  $\text{GW}/\text{cm}^2$ .

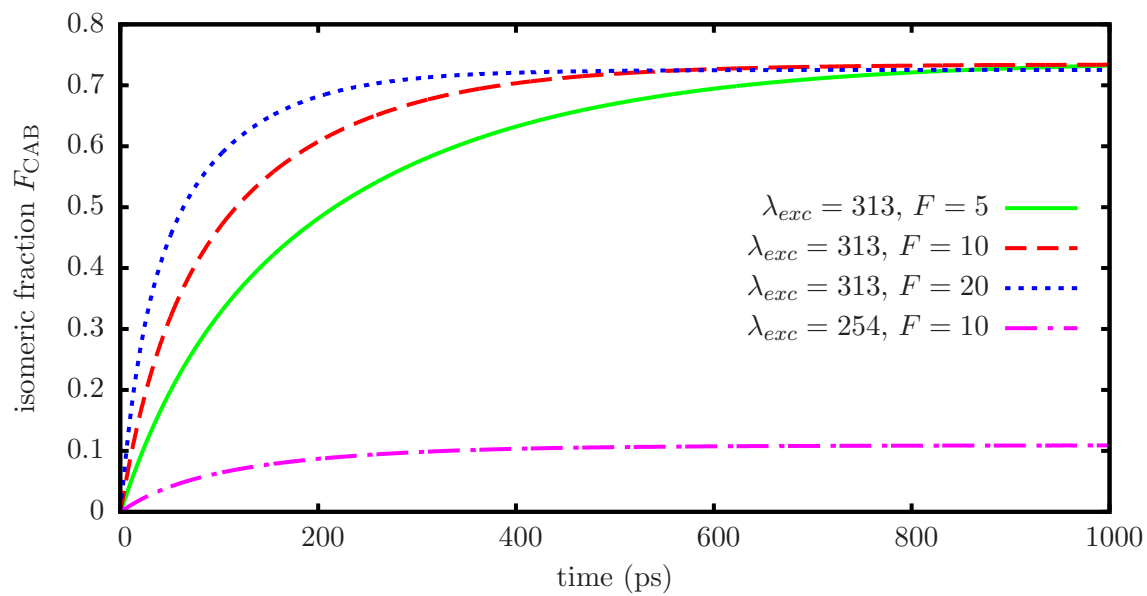

Figure S4: Dichroic ratios as functions of time, with  $\lambda_{exc} = 313$  nm and two different values of irradiance.

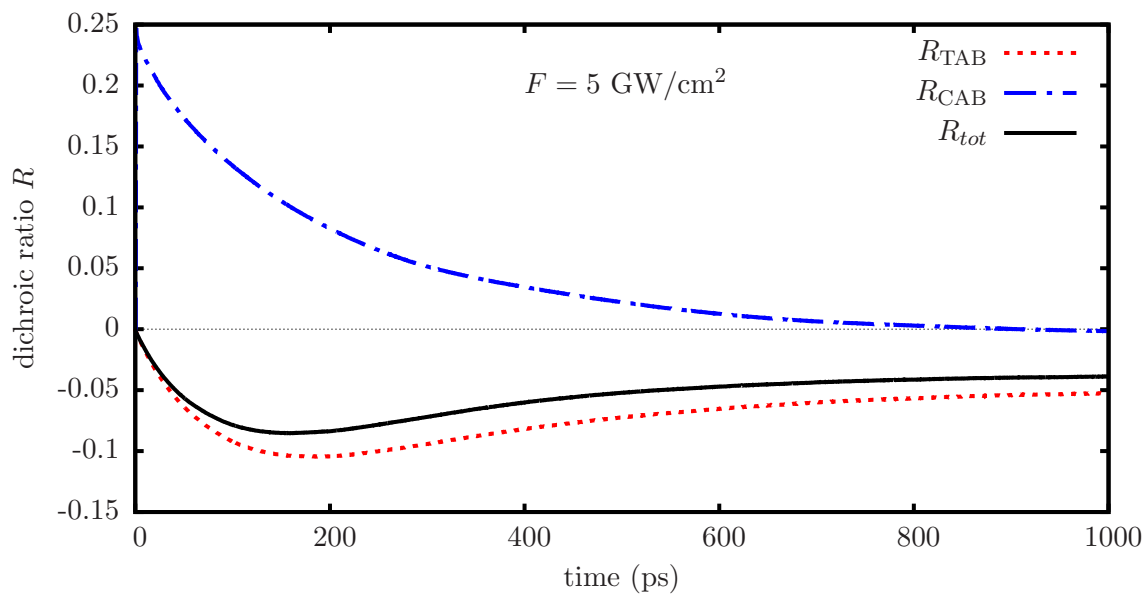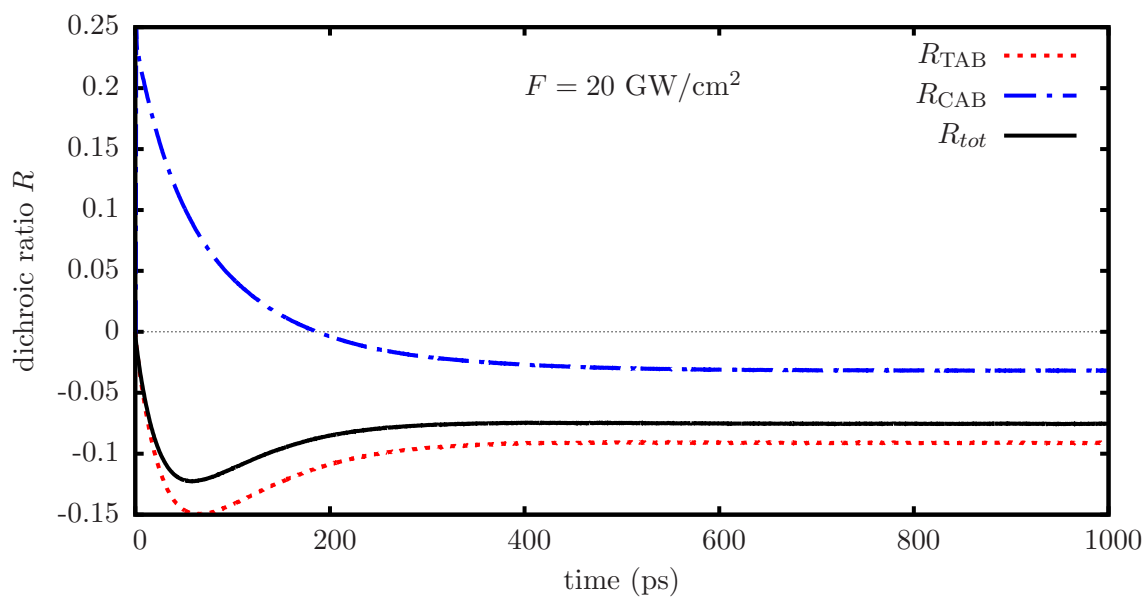

Supplement: c4cp03472d1.pdf [file c4cp03472d1.pdf]
